# Supplementary material
Source: PubMed Central journal article supplement (PMC5710523)
Supplement: mcx099_suppl_supplementary_figure_1.pdf [file mcx099_suppl_supplementary_figure_1.pdf]

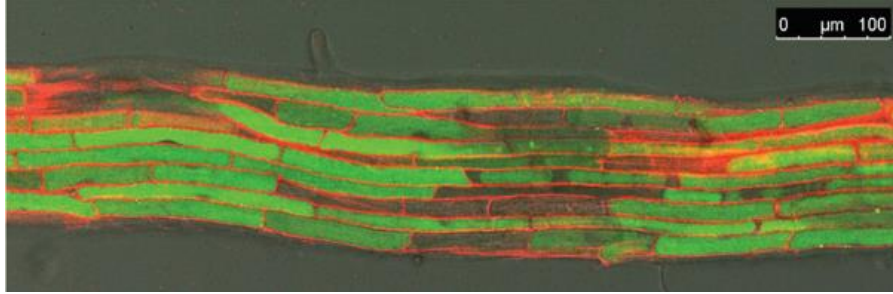

**Supplementary Figure 1.** Representative image of a root stained with propidium iodide (red) and Oregon Green (green) dyes used to measure root cell length by confocal microscopy. After image capture, cell lengths were measured using ImageJ.
