# Supplementary material
Source: PubMed Central journal article supplement (PMC5710523)
Supplement: mcx099_suppl_supplementary_figure_2.pdf [file mcx099_suppl_supplementary_figure_2.pdf]

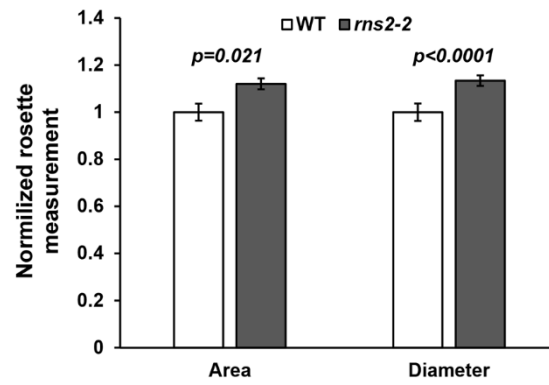

**Supplementary Figure 2.** Rosette size phenotype of the *rns2-2* mutant. Basal rosettes of mature (four-week-old) plants were measured for using Rosette Tracker software. Area and diameter were significantly different (*t*-test) between WT and *rns2-2* plants. 66 plants from each genotype were analyzed.
