# Supplementary material
Source: PubMed Central journal article supplement (PMC5710523)
Supplement: mcx099_suppl_supplementary_figure_3.pdf [file mcx099_suppl_supplementary_figure_3.pdf]

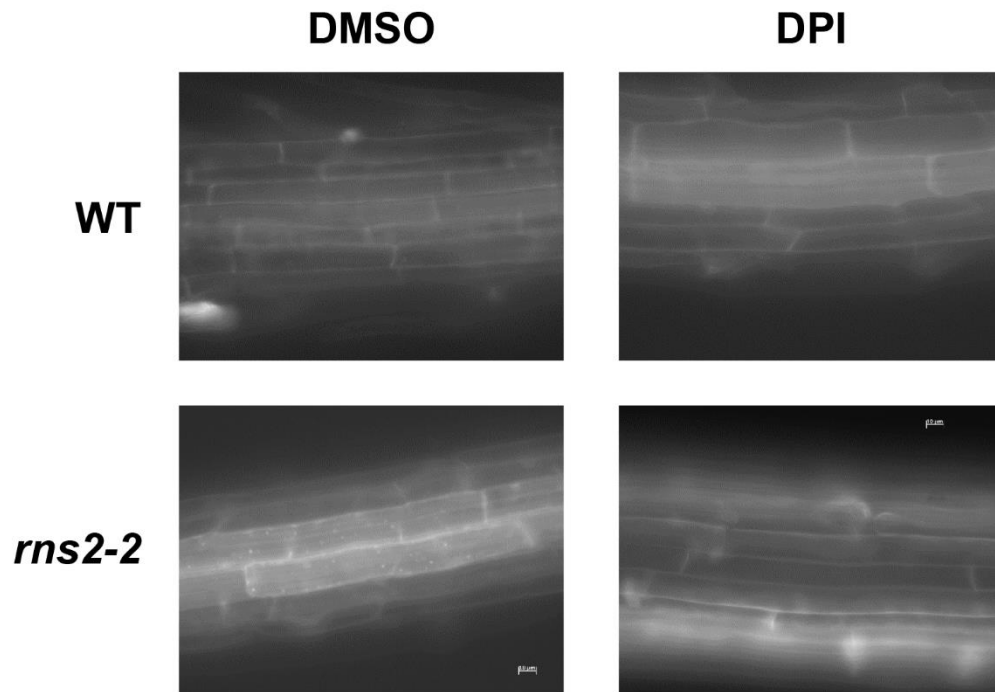

**Supplementary Figure 3.** ROS signaling controls autophagy in *rns2-2* plants. Roots of WT or *rns2-2* seedlings were treated with DPI (NADPH oxidase inhibitor) or DMSO (solvent control) and then stained with 50  $\mu$ M monodansylcadaverine (MDC) and imaged using fluorescence microscopy. Scale bar: 10  $\mu$ m.
